# Supplementary material for: Pooled image-base screening of mitochondria with microraft isolation distinguishes pathogenic mitofusin 2 mutations
Source: PubMed Central journal article supplement (PMC9596453; doi:10.1038/s42003-022-04089-y), 2022-10-25
Supplement: 42003_2022_4089_MOESM2_ESM.pdf [file 42003_2022_4089_MOESM2_ESM.pdf]

## Description of Additional Supplementary Files

**File name:** Supplementary Data 1

**Description:** MFN2 gRNA Library

**File name:** Supplementary Data 2

**Description:** Figure Source Data for all except 5c, 5d

**File name:** Supplementary Data 3

**Description:** Fig 5c Source Data

**File name:** Supplementary Data 4

**Description:** Fig 5d Source Data
